# Supplementary material
Source: HighWire-hosted journal article supplement (https://erj.ersjournals.com/content/55/2/1900506)
Supplement: inline-supplementary-material-1 [file inline-supplementary-material-1.pdf]

## **APPENDIX**

### **ESR-ERS Joint Position Paper on Lung Cancer Screening**

- I. Overview of Lung Cancer Screening activities in Europe**
- II. Tobacco Cessation**
- III. State-of-the-art treatment of early stage (1A) lung cancer**
- IV. Incidental Findings**
- V. The psychological impact of lung cancer screening**

## I. Overview of Lung Cancer Screening activities in Europe

The current status of lung cancer screening (LCS) in individual European countries is presented. Table 1 provides an overview of population, smoking prevalence and annual lung cancer deaths in Europe.

### *Austria*

Currently, there is no organised nation-wide lung cancer screening programme in Austria. Opportunistic screening is covered by some regional insurance companies. Screening should follow the consensus paper of the Austrian Pulmonological Society (ÖGP) and the Austrian Society of Roentgenology (ÖRG) published in 2013, which intended the inclusion criteria of the NLST [1]. The follow-up of screen-detected nodules should follow the nodule management protocol of the NELSON trial. A pilot study is in preparation which aims to get an estimate on the cost-effectiveness of lung cancer screening in Austria.

### *Belgium*

Belgium participated in the NELSON trial through one institution, enrolling a small number of participants. Currently, there are no further lung cancer screening initiatives. Cancer screening in Belgium is organised on a population-based level with the different Belgian regions each having independent operational responsibility. Since cancer screening programmes (breast, cervical and colorectal cancer) were previously implemented only following European regulations, this will be no different for lung cancer screening. During parliamentary questioning, at the occasion of the presentation of the NELSON data, the Flemish minister of Health Care stated that cost-effectiveness and the possible harms of screening would be important issues in considering possible implementation in the future [2].

### *France*

Lung cancer screening is not currently organised in France and it remains opportunistic [3]. Following NLST results, a taskforce from several academic groups published a statement favouring annual lung cancer screening using NLST eligibility criteria and NELSON-derived nodule management [4]. However, in 2016, French health authority stated that lung cancer was not ready for an active and organised screening policy, and encouraged research in this field [5]. Recently, intermediate results of a real-life experience of annual low-dose CT-scan in a French area (*Somme*) were released [4, 6]. Participation rate was 65%, 6.7% were screened positive, and 2.2% overall were diagnosed with cancer (82% stages I-II). Only one false-positive was investigated with surgical procedure [6]. Several trials were rejected from public granting, and some cohort studies are in preparation but still need public grant approval. Following NELSON results, the academic taskforce met again and released a statement advocating for LCS experimentation. New national guidelines are underway and discussions with health agencies are ongoing.

### *Germany*

The single-site German randomised controlled lung cancer screening trial (LUSI) recruited 4,052 screenees [7]. The results show a statistically significant reduction in lung cancer mortality among women, but not among in the CT arm after 8.8 years [8].

The novel official German lung cancer guideline recommends screening using low-dose CT (LDCT) and encourages the use of a risk model [9]. The new radiation protection legislation also opens the way to apply for the establishment of a program for individualised early detection of lung cancer. Such programs will be strictly quality-controlled, and probably associated with certified lung cancer centres throughout the country. Discussions are ongoing regarding details and financial considerations.

### *Greece*

Smoking is highly prevalent in Greece. The proportion of daily smokers is one of the highest in Europe, at 27% of the general population. Among daily smokers, heavy smokers are the majority, with almost 1 in every 7 adults being heavy smokers [10]. As a result, lung cancer is responsible for more than 8,000 deaths in Greece per year. Men are affected predominantly, having the highest percentage of deaths due to lung cancer in Europe, at 9.8 % [11]. Despite the high impact of smoking habits and lung cancer in the Greek population, there is currently no active LCS programme.

### *Israel*

In Israel, the rate of smoking varies significantly based upon ethnicity and is 22 / 44% in males (Jewish / Arab) and 15 / 7 % in women respectively. Israel has 2,400 new cases of lung cancer every year. Screening programmes are emerging through private services; however, reimbursement has so far been rejected. Recently, upon a multi-disciplinary consensus statement, the ministry of health adopted the recommendation for screening and built a national programme in line with the NLST eligibility criteria. As the incidence of lung cancer is lower than that expected for the rate of smoking, and in order to increase the cost/benefit ratio from screening, reimbursement may be approved this year for those above the age of 60.

### *Italy*

Italian randomised controlled LCS trials by LDCT recruited some 10,000 screenees, and a further 9,000 were recruited in LDCT single arm trials [12]. These figures were scattered over four independent centres, resulting in underpowered small cohorts [13]. Data pooling by two centres showed a reduction of overall mortality by LDCT, yet this was not statistically significant [14]. Significant 39% reduction of lung cancer mortality was recently reported by the Multicentric Italian Lung Detection (MILD) trial, with further specific emphasis on long-term effects beyond 5 years [15]. Noteworthy, smoking cessation was confirmed a pivotal component to the final outcome of overall mortality control [16]. The ongoing Italian LCS trials aim to prospectively test plasmatic micro RNA biomarkers and to select low-risk subjects for low-intensity screening (e.g. LDCT every 3 years) [17-19].

### *Netherlands*

There is currently no organised lung cancer screening in The Netherlands. The authorities have indicated that they are unlikely to make recommendations or decisions regarding implementation until the results from the Dutch-Belgian NELSON trial have been published. This large trial involved 7,900 participants in the CT screening arm and compared them to 7,892 participants in the control arm between 2003 and 2015 [20]. The announcement in September 2018 of the positive NELSON results immediately led to a debate in Dutch media on the need for screening implementation. Several initiatives were announced that are preparing requests to the Dutch regulatory authorities on population screening to establish an implementation programme.

### *Portugal*

Portugal lags behind the tobacco epidemic, presenting lower lung cancer mortality compared to other European countries. Over recent decades, the progressive increase in tobacco use among females has been followed by a late steady rise in women lung cancer mortality even though it is still comparatively rather low. In contrast, tobacco consumption in males has decreased but not consistently in all age groups [21]. Trends in lung cancer mortality until 2005 depict stabilisation among males [22]. More recently, cancer incidence estimates in the north of Portugal (2009-2020) predict a steep rise in lung cancer, especially among women. This is mostly attributable to increased risk of developing lung cancer rather than demographic changes [23]. Notably, lung cancer mortality is alarmingly high in the Azores

region [24]. Currently, there is no organised lung cancer screening programme in Portugal. While medical societies look forward to evidence-based guidelines on LCS, a population-based survey in mainland Portugal shows that most participants (62.3%) believe that organised LCS should be implemented after a specific age [25].

#### *Russian Federation*

Russia is still predominantly using “fluorography” for population screening for lung diseases, primarily tuberculosis. However, the effectiveness and efficiency of this approach is very controversial as the majority of tuberculosis cases are diagnosed in high-risk groups. In 2016, an LDCT screening programme was launched in Moscow. In 2018, baseline screening was completed: 5310 individuals (53% men, 47% women) aged 18 to 92 years (average 62 years) participated. The final risk-group cohort included 4,762 persons. The detected lesions were: Lung-RADS 3 in 291 (6.1%) patients, 228 (4.8%) Lung-RADS 4A, and 196 (4.1%) Lung-RADS 4B/4X. All 4B and 4X patients were referred to oncologists. Malignant neoplasms were diagnosed in 84 cases (1.76% of the cohort), with 40.3% of stage I-II lung cancers. The number needed to screen (NNS) to identify one lung cancer patient was 57, and 207 to detect one Stage I lung cancer. The results of the study will be published in early 2019. This LDCT programme has initiated a movement to reject fluorography screening in Russia, and to initiate similar screening programmes in other regions of Russia. It has also increased the demand for Picture Archiving and Communication Systems (PACS), as well as interest in artificial intelligence services for the radiologists’ augmentation. The LDCT screening programme continues in Moscow.

#### *United Kingdom*

Lung cancer screening is not currently recommended as a national programme in the UK. The UK Lung Screen Trials (UKLS) previously reported on the baseline findings of CT screening in approximately 2,000 participants [26]. Currently there are a number of ongoing early lung cancer detection pilot projects underway in many parts of the UK using low-dose CT [27]. While these projects are being delivered at a local level, including the use of community-based mobile low dose CT scanners, they share many similarities including the use of risk-prediction models to recruit participants, the use of standardised nodule management guidelines based on volumetry, and the incorporation of lung health checks at the time of patient visit.

#### **Conclusion**

LCS by LDCT reduces specific mortality in some clinical trials but, but several concerns remain: cost-effectiveness, eligibility optimisation, service implementation, balance of benefits and harms, gender, or participation rate. First-released outcomes of screening programmes in the US (for 2016 and 2017) are contrasted: 90% of screened individuals were eligible, but only 2 to 3% of the eligible population attended a screening CT scan [28]. However, this programme is not nationally organised, and lacks quality assurance measures. By contrast, most organised trials showed higher participation rates. This contrast should highlight to the scientific community, as well as health policy makers, that national organisation of lung cancer screening - as for breast or colon cancer - should be highly encouraged in all European countries.

**Appendix Table A1.** Population, smoking prevalence and annual lung cancer deaths in Europe.

***Overview of Lung Cancer Screening activities in Europe***

| Area  | Country <sup>A</sup>             | Population >15 yo, in 2016 <sup>B</sup> | Prevalence of current tobacco smoking in >15yo, in 2016 (%) <sup>C</sup> |         |       | Estimation <sup>D</sup> of current smokers(N) | Number of lung cancer deaths in 2018 (N <sup>E</sup> |         |         |
|-------|----------------------------------|-----------------------------------------|--------------------------------------------------------------------------|---------|-------|-----------------------------------------------|------------------------------------------------------|---------|---------|
|       |                                  | Both                                    | Both                                                                     | Females | Males | Both                                          | Both                                                 | Males   | Females |
| ALL   | Europe <sup>F</sup>              | 623 686 886                             | 29.4                                                                     | 20.7    | 38.1  | 192 632 135                                   | 387 136                                              | 266 727 | 120 409 |
| East  | Belarus                          | 7 920 202                               | 28.3                                                                     | 10.5    | 46.1  | 2 241 417                                     | 2 944                                                | 2 563   | 381     |
|       | Bulgaria                         | 6 126 450                               | 37.3                                                                     | 30.1    | 44.4  | 2 285 166                                     | 3 867                                                | 2 987   | 880     |
|       | Czech Republic                   | 8 995 819                               | 34.4                                                                     | 30.5    | 38.3  | 3 094 562                                     | 5 217                                                | 3 427   | 1 790   |
|       | Hungary                          | 8 353 228                               | 30.8                                                                     | 26.8    | 34.8  | 2 572 794                                     | 8 893                                                | 5 358   | 3 535   |
|       | Poland                           | 32 565 516                              | 28.2                                                                     | 23.3    | 33.1  | 9 183 476                                     | 26 509                                               | 17 135  | 9 374   |
|       | Republic of Moldova <sup>1</sup> | 3 421 545                               | 25.3                                                                     | 5.9     | 44.6  | 865 651                                       | 1 326                                                | 1 058   | 268     |
|       | Romania                          | 16 749 517                              | 30                                                                       | 22.9    | 37.1  | 5 024 855                                     | 10 277                                               | 7 838   | 2 439   |
|       | Russian Federation               | 119 070 212                             | 40.9                                                                     | 23.4    | 58.3  | 48 699 717                                    | 54 595                                               | 44 543  | 10 052  |
|       | Slovakia                         | 4 611 322                               | 30.4                                                                     | 23.1    | 37.7  | 1 401 842                                     | 2 436                                                | 1 757   | 679     |
|       | Ukraine <sup>2</sup>             | 37 670 123                              | 30.5                                                                     | 13.5    | 47.4  | 11 489 388                                    | 15 295                                               | 12 600  | 2 695   |
| North | Denmark                          | 4 764 023                               | 19.1                                                                     | 19.3    | 18.8  | 909 928                                       | 4 058                                                | 2 117   | 1 941   |
|       | Estonia                          | 1 099 883                               | 31.9                                                                     | 24.5    | 39.3  | 350 863                                       | 722                                                  | 531     | 191     |
|       | Finland <sup>3</sup>             | 4 602 248                               | 20.5                                                                     | 18.3    | 22.6  | 943 461                                       | 2 322                                                | 1 408   | 914     |
|       | Iceland                          | 265 423                                 | 14.8                                                                     | 14.3    | 15.2  | 39 283                                        | 143                                                  | 69      | 74      |
|       | Ireland                          | 3 700 349                               | 24.4                                                                     | 23      | 25.7  | 902 885                                       | 2 060                                                | 1 101   | 959     |
|       | Latvia                           | 1 670 202                               | 38.3                                                                     | 25.6    | 51    | 639 687                                       | 930                                                  | 685     | 245     |
|       | Lithuania                        | 2 480 985                               | 29.7                                                                     | 21.3    | 38    | 736 853                                       | 1 363                                                | 1 098   | 265     |
|       | Norway <sup>4</sup>              | 4 317 947                               | 20.2                                                                     | 19.6    | 20.7  | 872 225                                       | 2 386                                                | 1 252   | 1 134   |
|       | Sweden                           | 8 125 842                               | 18.9                                                                     | 18.8    | 18.9  | 1 535 784                                     | 3 849                                                | 1 844   | 2 005   |
|       | United Kingdom                   | 54 197 417                              | 22.4                                                                     | 20      | 24.7  | 12 140 221                                    | 37 688                                               | 19 918  | 17 770  |
| South | Albania                          | 2 407 729                               | 29.2                                                                     | 7.1     | 51.2  | 703 057                                       | 1 021                                                | 859     | 162     |
|       | Bosnia & Herzegovina             | 3 016 713                               | 39                                                                       | 30.2    | 47.7  | 1 176 518                                     | 2 174                                                | 1 730   | 444     |
|       | Croatia                          | 3 593 837                               | 37.1                                                                     | 34.3    | 39.9  | 1 333 314                                     | 2 879                                                | 2 097   | 782     |

|             |                     |            |      |      |      |            |        |        |        |
|-------------|---------------------|------------|------|------|------|------------|--------|--------|--------|
|             | Greece              | 9 579 222  | 43.7 | 35.3 | 52   | 4 186 120  | 8 343  | 6 688  | 1 655  |
|             | Italy               | 51 342 604 | 23.8 | 19.8 | 27.8 | 12 219 540 | 34 512 | 24 034 | 10 478 |
|             | Malta               | 367 499    | 25.6 | 20.9 | 30.2 | 94 080     | 188    | 151    | 37     |
|             | Montenegro          | 513 800    | 46   | 44   | 47.9 | 236 348    | 344    | 268    | 76     |
|             | Portugal            | 8 933 939  | 23.2 | 16.3 | 30   | 2 072 674  | 4 671  | 3 654  | 1 017  |
|             | Serbia <sup>5</sup> | 7 358 318  | 39   | 37.7 | 40.2 | 2 869 744  | 6 811  | 4 824  | 1 987  |
|             | Slovenia            | 1 769 909  | 22.6 | 20.1 | 25   | 399 999    | 1 282  | 841    | 441    |
|             | Spain <sup>6</sup>  | 39 498 395 | 29.4 | 27.4 | 31.4 | 11 612 528 | 22 896 | 17 559 | 5 337  |
|             | TFYR Macedonia      | 1 731 874  |      |      |      |            | 947    | 761    | 186    |
| <b>West</b> | Austria             | 7 484 052  | 29.7 | 28.4 | 30.9 | 2 222 763  | 4 389  | 2 648  | 1 741  |
|             | Belgium             | 9 423 906  | 28.3 | 25.1 | 31.4 | 2 666 965  | 7 037  | 4 676  | 2 361  |
|             | France              | 52 958 172 | 32.9 | 30.1 | 35.6 | 17 423 239 | 37 459 | 26 156 | 11 303 |
|             | Germany             | 71 192 481 | 30.7 | 28.2 | 33.1 | 21 856 092 | 50 560 | 32 168 | 18 392 |
|             | Luxembourg          | 481 230    | 23.5 | 20.9 | 26   | 113 089    | 232    | 154    | 78     |
|             | Netherlands         | 14 168 902 | 25.9 | 24.4 | 27.3 | 3 669 746  | 11 008 | 6 096  | 4 912  |
|             | Switzerland         | 7 156 051  | 25.8 | 22.6 | 28.9 | 1 846 261  | 3 503  | 2 074  | 1 429  |

1. Including Transnistria.
  2. Including Crimea.
  3. Including Åland Islands.
  4. Including Svalbard and Jan Mayen Islands.
  5. Including Kosovo.
  6. Including Canary Islands, Ceuta and Melilla.
- A. List of country and region is from UNStats (available at <https://unstats.un.org/unsd/methodology/m49/>)
- B. Data are for 2016. United Nations, Department of Economic and Social Affairs, Population Division (2017). World Population Prospects: The 2017 Revision, custom data acquired via website available at <https://population.un.org/wpp/DataQuery/>
- C. Age-standardized prevalence of current tobacco smoking among persons aged 15 years and older , 2016 from Global Health Observatory data repository, Prevalence of current tobacco use, Data by country, available at <http://apps.who.int/gho/data/view.main.GSWCAH20v>
- D. Calculated from the ratio provided and the population number.
- E. Data are for 2018, International Agency for Research on cancer, Global Cancer Observatory, available at <http://gco.iarc.fr/today/home>
- F. Data for Europe are calculated as the sum of all other data in the row.
- Yo: Years-Old ;

## II: Tobacco Cessation

**Appendix Table A2.** Impact of Lung Cancer Screening on smoking behaviour change. Main findings from prospective cohort studies and randomised control trials

| First Author / Date       | N Total | % Men | Study Type           | Cessation Intervention                                                              | Baseline prevalence Tobacco use (%) |      | Quit attempt (%) |    | Smoking Abstinence (%) |      |       | Relapse in former Smokers (%) |    |       |
|---------------------------|---------|-------|----------------------|-------------------------------------------------------------------------------------|-------------------------------------|------|------------------|----|------------------------|------|-------|-------------------------------|----|-------|
|                           |         |       |                      |                                                                                     | LDCT                                | CG   | LDCT             | CG | LDCT / Intervention    | CG   | total | LDCT                          | CG | total |
| Schnoll / 2002 [29]       | 55      | 0     | PC                   | 100                                                                                 | -                                   | -    | -                | -  | 16                     | -    | -     | -                             | -  | -     |
| Cox / 2003 [30]           | 1475    | 53    | PC                   | none                                                                                | 61                                  | -    | -                | -  | 14                     | -    | -     | 10                            | -  | -     |
| Clark / 2004 (1) [31]     | 85      | 54    | PC                   | web program                                                                         | 61                                  | -    | 68               | -  | 5                      | -    | -     | -                             | -  | -     |
| Clark / 2004 (2) [31]     | 86      | 48    | PC                   | Self-help materials                                                                 | 61                                  | -    | 48               | -  | 10                     | -    | -     | -                             | -  | -     |
| MacRedmond / 2006 [32]    | 449     | 49%   | PC                   | Limited counselling                                                                 | 69                                  | -    | -                | -  | 19                     | -    | -     | 2                             | -  | -     |
| Anderson / 2009 [33]      | 2083    | 45    | PC                   | Limited counselling                                                                 | 35                                  | -    | -                | -  | 29                     | -    | -     | 4                             | -  | -     |
| Ashraf / 2009 [34]        | 4104    | 55    | RCT                  | Limited counselling                                                                 | 75                                  | 77   | -                | -  | 11                     | 10   | 11    | 10                            | 11 | 9     |
| Styn / 2009 [35]          | 2094    | 49    | PC                   | Limited counselling                                                                 | 100                                 | -    | 59               | -  | 16                     | -    | -     | -                             | -  | -     |
| Van der Aalst / 2010 [36] | 1248    | 100   | RCT                  | Brochure                                                                            | 91                                  | 78   | -                | -  | 14                     | 16   | -     | -                             | -  | -     |
| Ashraf / 2014 [37]        | 4104    | 55    | RCT                  | Limited counselling                                                                 | 75.3                                | 76.9 | -                | -  | -                      | -    | 24    | -                             | -  | 10    |
| Pozzi/ 2015 [38]          | 187     |       | PC<br>(sub-set MILD) | Varenicline+ counselling                                                            | 100                                 | 100  | -                | -  | 19.8                   | -    | -     | -                             | -  | -     |
| Marshall/ 2016 [39]       | 55      | -     | RCT                  | Counselling + quit aids (web/print) + quit line info vs print aids + quit line info | -                                   | -    | -                | -  | 14.3                   | 18.5 | 16.4  | -                             | -  | -     |
| Brain/ 2017 [40]          | 4055    |       | RCT                  |                                                                                     | 49                                  | 51   |                  |    | 24.0                   | 21.0 | -     | -                             | -  | -     |
| Taylor/2017 [41]          | 92      | 43.5  | RCT                  | Telephone counselling                                                               | 100                                 | -    | -                | -  | 17.4                   | 4.3  | -     | -                             | -  | -     |





Info- information; LDCT – Low dose computerized tomography; CG – Control group; PC - prospective cohort; RCT - randomised control trial MI – Motivation interview  
Adapted from Leone et al. [42].

### III. State-of-the-art treatment of early stage (1A) lung cancer

Stage 1A lung cancer detected at LCS will pose specific challenges to organ-sparing treatment options. While lobectomy and systematic lymph node dissection is the standard surgical procedure [43], there are data supporting sub-lobar resection vs. lobectomy. When compared to lobectomy in stage I Non-small-cell lung carcinoma (NSCLC), sub-lobar resection had a higher risk of local recurrence, but fewer peri-operative pulmonary complications and similar cancer-related mortality [44]. Wedge resection was associated with an increased risk of loco-regional recurrence. In a different study, lobectomy and sublobar resection groups had similar 5-year overall survival (61.8% vs 55.6%) with the sublobar group having an increased risk of recurrence [45]. In patients with NSCLC <2 cm, the 5- and 10-year survival rates after segmentectomy were 83% and 83%, respectively, versus 81% and 64% after lobectomy ( $p = 0.66$ ) [46]. El-Sherif et al [47] showed a similar recurrence rate after sub-lobar vs. lobectomy in stage IA, but slightly worse in stage IB. Investigating 294 lobectomies and 53 sub-lobar resections, Altorki et al showed that 10-year survival rates were 86% and 85%, with recurrence rates of 19% vs 12%, respectively (NS) [48].

For inoperable patients, stereotactic radiotherapy (SBRT) is reported to be as effective as surgical resection, particularly for peripheral lesions [49]. SBRT was equivalent to lobectomy in the endpoints of loco-regional control and cancer-specific survival. In tumours up to 5 cm, the rates of disease-free and overall survival at 3 years were 48.3% and 55.8% respectively [50]. Radiofrequency ablation (RFA) is another possible treatment option for inoperable patients with a local recurrence rate of 40% at 2 years after RFA [51]. Local control was marginally better for tumours <2 cm, but it was still not close to the rates of SBRT or sublobar resection. However, in a recent prospective multicentre study of RFA in stage IA lung cancer, local control rate at 1 year was 84% and 81% at 3 years. The OS rate was 92% at 1 year and 58% at 3 years [52]. The forced expiratory volume was stable in most patients and there was no significant change in the global health status or in the quality of life following RFA. It is important to note that patients who are not candidate for surgery were not eligible for LDCT based screening studies. Interestingly enough, Tanner et al [53] explored this issue of patients with multiple co-morbidities within NLST and compared them with elderly patients with both with and without comorbidities. Those who could not undergo surgery had very poor outcomes.

Due to the lack of evidence in this important field of the therapeutic options in stage 1A lung cancer detected at LCS, ERS and ESR have liaised with ESTS and ESTRO to produce a joint statement paper.

## IV. Incidental Findings

In LCS, clear algorithms should be in place regarding which findings will be reported and which require further evaluation, based on the following principles:

- The finding should be real (i.e. there should be general agreement with minimal inter-observer variation as to the presence of the finding).
- The finding must be clinically significant (i.e. it should usually be associated with an important or adverse impact on the patient).
- There should be an established intervention associated with the observation that leads to patient benefit.
- The reporting of incidental findings should be accompanied by specific recommendations for intervention.

The management of incidental findings can thus be broadly categorised as follows:

- Findings that require immediate action (e.g. pneumothorax), prompting emergency referral.
- Findings indicating a likelihood of non-pulmonary cancer, which requires further investigation (e.g. breast mass), prompting referral to a specialist.
- Other non-cancer findings requiring further investigation or that may lead to beneficial interventions (e.g. significant diffuse parenchymal lung or dilated ascending aorta), prompting referral to a specialist or a notification of general practitioner.
- Findings which are usually clinically insignificant, which may be prone to observer variation and for which there is no established beneficial intervention do not need to be reported (e.g. minor atelectasis, renal or liver or thyroid cysts), needing no communication.

Screening programmes should use these principles to develop locally agreed protocols for management of incidental findings. A list of examples of incidentals findings that can be encountered in LCS is set out in Table A3.

**Appendix Table A3.** Examples of incidental findings that may be identified in low dose CT screening for lung cancer.

|                                                                                                                                                                                                       |
|-------------------------------------------------------------------------------------------------------------------------------------------------------------------------------------------------------|
| <b>Neck</b>                                                                                                                                                                                           |
| <b>Thyroid gland</b><br>-nodule<br>-cysts<br>-calcifications                                                                                                                                          |
| <b>Lymphadenopathy</b>                                                                                                                                                                                |
| <b>Thoracic cavity</b>                                                                                                                                                                                |
| <b>Trachea, bronchi, bronchioles</b><br><b>Trachea:</b><br>-tracheal stenosis<br>-tracheomalacia<br>-mass<br><b>Bronchi:</b><br>-bronchial thickening<br>-bronchiectasis<br>-secretion/foreign bodies |
| <b>Lungs</b><br>-linear opacities                                                                                                                                                                     |

-increased lung attenuation (diffuse ground glass opacity, consolidation) -decreased lung attenuation (cyst(s), emphysema)  
-combined pattern (honeycombing, crazy-paving pattern)  
-interstitial opacities with or without traction bronchiectasis

#### **Pleura**

-pleural effusion, unilateral or bilateral  
-pneumothorax

#### **Heart**

-left ventricular hypertrophy or dilatation  
-valvular calcifications  
-right ventricular hypertrophy or dilatation  
-coronary artery calcifications

#### **Pericardium**

-pericardial effusion  
-pericardial calcifications

#### **Oesophagus**

-diverticulum/diverticula  
-achalasia or dilatation  
-oesophageal mass

#### **Mediastinum**

-pneumomediastinum  
-lymphadenopathy  
-masses

#### **Vessels:**

-aorta/arteries: arteriosclerosis , aneurysms  
-pulmonary arteries: enlarged main pulmonary arteries

#### **Diaphragms**

#### **Hernia**

-hiatal hernia  
-other diaphragmatic hernias

#### **Diaphragmatic elevation, unilateral or bilateral**

#### **Abdominal cavity**

#### **Liver**

##### ***focal lesion(s):***

-cyst(s), solitary or multiple  
-masses

##### ***generalized lesion(s):***

-liver cirrhosis/irregularity

#### **Gallbladder, bile ducts**

-biliary calculi  
-choledocholithiasis  
-cholestasis, intrahepatic or extrahepatic  
-aerobilia

#### **Pancreas**

##### ***focal lesion(s):***

-cyst(s), solitary or multiple  
-masses

##### ***generalized lesion(s):***

-calcifications  
-pancreatic atrophy  
-pancreatitis, acute or chronic

#### **Stomach**

-masses

#### **Spleen**

##### ***focal lesion(s):***

-accessory spleen  
-cyst(s), solitary or multiple  
-masses  
-calcifications

##### ***generalized lesion(s):***

-splenomegaly

#### **Peritoneum**

-ascites

- pneumoperitoneum
- nodules/masses

**Kidneys**

***focal lesion(s):***

- cyst(s), solitary or multiple
- masses
- calcifications, nephrocalcinosis
- urolithiasis

***generalized lesion(s):***

- atrophic kidney(s)
- hydronephrosis

**Adrenal glands**

- nodules
- masses
- hypertrophy

**Retroperitoneum**

***Vessels:***

- aorta/arteries: arteriosclerosis, aneurysms or stenosis

**Skeleton, joints, ligaments, tendons**

- osteoporosis
- diffuse idiopathic skeletal hyperostosis (DISH)
- spondylosis
- spondylodiscitis
- lytic or sclerotic lesions

**Skin, subcutaneous tissue, muscular system**

- lipoma
- sebaceous cysts

**Breast**

- nodules
- masses

**Obesity**

**Cachexia, sarcopenia**

**Previous surgery**

## **V. The psychological impact of lung cancer screening**

Selection bias has been revealed as a problem in an RCT: the participants in the Danish Lung Cancer Screening Trial (DLCST) had a more favourable socio-demographic profile and were more psychologically robust compared to the general population of heavy smokers [54]. Therefore, selection bias could have resulted in underestimating the actual psychosocial consequences [54].

In lung cancer CT screening, several studies about health-related quality of life, psychological and psychosocial have been conducted. Two systematic reviews have been identified regarding this topic and neither included an assessment of the measurement properties of the PROMs used nor properly assessed the presence of selection and attrition [55, 56].

The patient-reported outcome measures on the consequences of screening in lung cancer (PROM COS-LC) was developed and validated using qualitative interviews in focus groups and psychometrically analysing survey data [57]. One study, using the COS-LC as a primary outcome and investigating the first two screening rounds in the DLCST, concluded that participation in the DLCST experienced negative psychosocial consequences for all participants, worst for the control group [58]. Another study, also using COS-LC as the primary outcome, investigated all DLCST's five screening round, concluding that these negative psychosocial consequences persisted throughout the trial's four years: both the intervention group and the control reported higher negative consequences compared to the baseline measurement, again worst for the control group [59].

## Appendix-References

1. Prosch H, Studnicka M, Eisenhuber E, Olschewski H, Stiefsohn E, Hartl S, Herold C, Burghuber O, Mostbeck G: **Lungenkarzinom Screening mit Niedrigdosis-CT: Stellungnahme der Österreichischen Röntgengesellschaft und der Österreichischen Gesellschaft für Pneumologie.** *Wien Klin Wochenschr* 2013, **125**(11-12):339-345.
2. Parlement V: **Vraag om uitleg over een screening op longkanker.** In. <https://www.vlaamsparlement.be/commissies/commissievergaderingen/1274026/verslag/1274749>; 2018.
3. Couraud S, Girard N, Erpeldinger S, Gueyffier F, Devouassoux G, Llorca G, Souquet PJ: **Physicians' knowledge and practice of lung cancer screening: a cross-sectional survey comparing general practitioners, thoracic oncologists, and pulmonologists in France.** *Clinical lung cancer* 2013, **14**(5):574-580.
4. Couraud S, Cortot AB, Greillier L, Gounant V, Mennecier B, Girard N, Besse B, Brouchet L, Castelnau O, Frappe P *et al*: **From randomized trials to the clinic: is it time to implement individual lung-cancer screening in clinical practice? A multidisciplinary statement from French experts on behalf of the French intergroup (IFCT) and the groupe d'Oncologie de langue française (GOLF).** *Annals of oncology : official journal of the European Society for Medical Oncology / ESMO* 2013, **24**(3):586-597.
5. Coureau G, Salmi LR, Etard C, Sancho-Garnier H, Sauvaget C, Mathoulin-Pelissier S: **Low-dose computed tomography screening for lung cancer in populations highly exposed to tobacco: A systematic methodological appraisal of published randomised controlled trials.** *European journal of cancer (Oxford, England : 1990)* 2016, **61**:146-156.
6. Leleu O, Auquier M, Carre O, Chauffert B, Dubreuil A, Petigny V, Trancart B, Berna P, Jounieaux V: **[Lung cancer screening with low-dose thoracic CT-scan in the Somme area].** *Revue des maladies respiratoires* 2017, **34**(3):262-267.
7. Becker N, Motsch E, Gross ML, Eigentopf A, Heussel CP, Dienemann H, Schnabel PA, Pilz L, Eichinger M, Optazait DE *et al*: **Randomized study on early detection of lung cancer with MSCT in Germany: study design and results of the first screening round.** *Journal of cancer research and clinical oncology* 2012, **138**(9):1475-1486.
8. Becker N, Motsch E, Trotter A, Heussel CP, Dienemann H, Schnabel PA, Kauczor HU, Gonzalez Maldonado S, Miller AB, Kaaks R *et al*: **Lung cancer mortality reduction by LDCT screening - results from the randomised German LUSI trial.** *International journal of cancer* 2019.
9. Leitlinienprogramm Onkologie (Deutsche Krebsgesellschaft DK, AWMF): **Prävention, Diagnostik, Therapie und Nachsorge des Lungenkarzinoms: S3 Leitlinie Lungenkarzinom.** In. Germany; 2018.
10. Eurostat: **Tobacco consumption statistics.** In. [https://ec.europa.eu/eurostat/statistics-explained/index.php/Tobacco\\_consumption\\_statistics](https://ec.europa.eu/eurostat/statistics-explained/index.php/Tobacco_consumption_statistics); 2014.
11. Eurostat: **1 in 4 deaths caused by cancer in the EU28** In: *Lung cancer main fatal cancer* <https://ec.europa.eu/eurostat/documents/2995521/6131615/3-25112014-BP-EN/aab2c2d3-aed9-430a-a561-e188b8ef49d8>; 2014.
12. Silva M, Pastorino U, Sverzellati N: **Lung cancer screening with low-dose CT in Europe: strength and weakness of diverse independent screening trials.** *Clinical radiology* 2017.

13. Paci E, Puliti D, Lopes Pegna A, Carrozzi L, Picozzi G, Falaschi F, Pistelli F, Aquilini F, Ocello C, Zappa M *et al*: **Mortality, survival and incidence rates in the ITALUNG randomised lung cancer screening trial.** *Thorax* 2017.
14. Infante M, Sestini S, Galeone C, Marchiano A, Lutman FR, Angeli E, Calareso G, Pelosi G, Sozzi G, Silva M *et al*: **Lung cancer screening with low-dose spiral computed tomography: evidence from a pooled analysis of two Italian randomized trials.** *European journal of cancer prevention : the official journal of the European Cancer Prevention Organisation* 2016.
15. Pastorino U, Silva M, Sestini S, Sabia F, Boeri M, Cantarutti A, Sverzellati N, Sozzi G, Corrao G, Marchiano A: **Prolonged lung cancer screening reduced 10-year mortality in the MILD trial: new confirmation of lung cancer screening efficacy.** *Annals of oncology : official journal of the European Society for Medical Oncology* 2019.
16. Pastorino U, Boffi R, Marchiano A, Sestini S, Munarini E, Calareso G, Boeri M, Pelosi G, Sozzi G, Silva M *et al*: **Stopping Smoking Reduces Mortality in Low-Dose Computed Tomography Screening Participants.** *Journal of thoracic oncology : official publication of the International Association for the Study of Lung Cancer* 2016, **11**(5):693-699.
17. Sozzi G, Boeri M, Rossi M, Verri C, Suatoni P, Bravi F, Roz L, Conte D, Grassi M, Sverzellati N *et al*: **Clinical utility of a plasma-based miRNA signature classifier within computed tomography lung cancer screening: a correlative MILD trial study.** *Journal of clinical oncology : official journal of the American Society of Clinical Oncology* 2014, **32**(8):768-773.
18. Montani F, Marzi MJ, Dezi F, Dama E, Carletti RM, Bonizzi G, Bertolotti R, Bellomi M, Rampinelli C, Maisonneuve P *et al*: **miR-Test: a blood test for lung cancer early detection.** *Journal of the National Cancer Institute* 2015, **107**(6):d1v063.
19. **Plasma microRNA Profiling as First Line Screening Test for Lung Cancer Detection: a Prospective Study (bioMILD) 2014**  
[<https://clinicaltrials.gov/ct2/show/study/NCT02247453>]
20. van Klaveren RJ, Oudkerk M, Prokop M, Scholten ET, Nackaerts K, Vernhout R, van Iersel CA, van den Bergh KA, van 't Westeinde S, van der Aalst C *et al*: **Management of lung nodules detected by volume CT scanning.** *The New England journal of medicine* 2009, **361**(23):2221-2229.
21. Ravara SB: **The Role of Healthcare Professionals in Tobacco Control.** UNIVERSIDADE DA BEIRA INTERIOR; 2016.
22. Alves L, Bastos J, Lunet N: **Trends in lung cancer mortality in Portugal (1955-2005).** *Revista portuguesa de pneumologia* 2009, **15**(4):575-587.
23. Castro C, Antunes L, Lunet N, Bento MJ: **Cancer incidence predictions in the North of Portugal: keeping population-based cancer registration up to date.** *European journal of cancer prevention : the official journal of the European Cancer Prevention Organisation (ECP)* 2016, **25**(5):472-480.
24. Health. PDo: **Direção-Geral da Saúde (DGS). Direção de Serviços de Informação e Análise Portugal -Doenças Oncológicas em números.** In. Lisbon; 2016.
25. Costa AR, Silva S, Moura-Ferreira P, Villaverde-Cabral M, Santos O, Carmo ID, Barros H, Lunet N: **Cancer screening in Portugal: sex differences in prevalence, awareness of organized programmes and perception of benefits and adverse effects.** *Health expectations : an international journal of public participation in health care and health policy* 2017, **20**(2):211-220.



26. Field JK, Duffy SW, Baldwin DR, Whyne DK, Devaraj A, Brain KE, Eisen T, Gosney J, Green BA, Holemans JA *et al*: **UK Lung Cancer RCT Pilot Screening Trial: baseline findings from the screening arm provide evidence for the potential implementation of lung cancer screening.** *Thorax* 2016, **71**(2):161-170.
27. Crosbie PA, Balata H, Evison M, Attack M, Bayliss-Brideaux V, Colligan D, Duerden R, Eaglesfield J, Edwards T, Elton P *et al*: **Implementing lung cancer screening: baseline results from a community-based 'Lung Health Check' pilot in deprived areas of Manchester.** *Thorax* 2018.
28. Pinsky PF: **Does the evidence support the implementation of lung cancer screening with low-dose computed tomography?** *Expert review of respiratory medicine* 2018, **12**(4):257-260.
29. Schnoll RA, Miller SM, Unger M, McAleer C, Halbherr T, Bradley P: **Characteristics of female smokers attending a lung cancer screening program: a pilot study with implications for program development.** *Lung cancer (Amsterdam, Netherlands)* 2002, **37**(3):257-265.
30. Cox LS, Clark MM, Jett JR, Patten CA, Schroeder DR, Nirelli LM, Swensen SJ, Hurt RD: **Change in smoking status after spiral chest computed tomography scan screening.** *Cancer* 2003, **98**(11):2495-2501.
31. Clark MM, Cox LS, Jett JR, Patten CA, Schroeder DR, Nirelli LM, Vickers K, Hurt RD, Swensen SJ: **Effectiveness of smoking cessation self-help materials in a lung cancer screening population.** *Lung cancer (Amsterdam, Netherlands)* 2004, **44**(1):13-21.
32. MacRedmond R, McVey G, Lee M, Costello RW, Kenny D, Foley C, Logan PM: **Screening for lung cancer using low dose CT scanning: results of 2 year follow up.** *Thorax* 2006, **61**(1):54-56.
33. Anderson CM, Yip R, Henschke CI, Yankelevitz DF, Ostroff JS, Burns DM: **Smoking cessation and relapse during a lung cancer screening program.** *Cancer epidemiology, biomarkers & prevention : a publication of the American Association for Cancer Research, cosponsored by the American Society of Preventive Oncology* 2009, **18**(12):3476-3483.
34. Ashraf H, Tonnesen P, Holst Pedersen J, Dirksen A, Thorsen H, Dossing M: **Effect of CT screening on smoking habits at 1-year follow-up in the Danish Lung Cancer Screening Trial (DLCST).** *Thorax* 2009, **64**(5):388-392.
35. Styn MA, Land SR, Perkins KA, Wilson DO, Romkes M, Weissfeld JL: **Smoking behavior 1 year after computed tomography screening for lung cancer: Effect of physician referral for abnormal CT findings.** *Cancer epidemiology, biomarkers & prevention : a publication of the American Association for Cancer Research, cosponsored by the American Society of Preventive Oncology* 2009, **18**(12):3484-3489.
36. van der Aalst CM, van den Bergh KA, Willemsen MC, de Koning HJ, van Klaveren RJ: **Lung cancer screening and smoking abstinence: 2 year follow-up data from the Dutch-Belgian randomised controlled lung cancer screening trial.** *Thorax* 2010, **65**(7):600-605.
37. Ashraf H, Saghir Z, Dirksen A, Pedersen JH, Thomsen LH, Dossing M, Tonnesen P: **Smoking habits in the randomised Danish Lung Cancer Screening Trial with low-dose CT: final results after a 5-year screening programme.** *Thorax* 2014, **69**(6):574-579.
38. Pozzi P, Munarini E, Bravi F, Rossi M, La Vecchia C, Boffi R, Pastorino U: **A combined smoking cessation intervention within a lung cancer screening trial: a pilot observational study.** *Tumori* 2015, **101**(3):306-311.

39. Marshall HM, Courtney DA, Passmore LH, McCaul EM, Yang IA, Bowman RV, Fong KM: **Brief Tailored Smoking Cessation Counseling in a Lung Cancer Screening Population is Feasible: A Pilot Randomized Controlled Trial.** *Nicotine & tobacco research : official journal of the Society for Research on Nicotine and Tobacco* 2016, **18**(7):1665-1669.
40. Brain K, Carter B, Lifford KJ, Burke O, Devaraj A, Baldwin DR, Duffy S, Field JK: **Impact of low-dose CT screening on smoking cessation among high-risk participants in the UK Lung Cancer Screening Trial.** *Thorax* 2017, **72**(10):912-918.
41. Taylor KL, Hagerman CJ, Luta G, Bellini PG, Stanton C, Abrams DB, Kramer JA, Anderson E, Regis S, McKee A *et al*: **Preliminary evaluation of a telephone-based smoking cessation intervention in the lung cancer screening setting: A randomized clinical trial.** *Lung cancer (Amsterdam, Netherlands)* 2017, **108**:242-246.
42. Leone FT, Evers-Casey S, Toll BA, Vachani A: **Treatment of tobacco use in lung cancer: Diagnosis and management of lung cancer, 3rd ed: American College of Chest Physicians evidence-based clinical practice guidelines.** *Chest* 2013, **143**(5 Suppl):e61S-e77S.
43. Ginsberg RJ, Rubinstein LV: **Randomized trial of lobectomy versus limited resection for T1 N0 non-small cell lung cancer. Lung Cancer Study Group.** *The Annals of thoracic surgery* 1995, **60**(3):615-622; discussion 622-613.
44. Patel AN, Santos RS, De Hoyos A, Luketich JD, Landreneau RJ: **Clinical trials of peripheral stage I (T1N0M0) non-small cell lung cancer.** *Seminars in thoracic and cardiovascular surgery* 2003, **15**(4):421-430.
45. Subramanian M, McMurry T, Meyers BF, Puri V, Kozower BD: **Long-Term Results for Clinical Stage IA Lung Cancer: Comparing Lobectomy and Sublobar Resection.** *The Annals of thoracic surgery* 2018, **106**(2):375-381.
46. Okumura M, Goto M, Ideguchi K, Tamura M, Sasaki H, Tanaka H, Matsumura A, Iuchi K: **Factors associated with outcome of segmentectomy for non-small cell lung cancer: long-term follow-up study at a single institution in Japan.** *Lung cancer (Amsterdam, Netherlands)* 2007, **58**(2):231-237.
47. El-Sherif A, Gooding WE, Santos R, Pettiford B, Ferson PF, Fernando HC, Urda SJ, Luketich JD, Landreneau RJ: **Outcomes of sublobar resection versus lobectomy for stage I non-small cell lung cancer: a 13-year analysis.** *The Annals of thoracic surgery* 2006, **82**(2):408-415; discussion 415-406.
48. Altorki NK, Yip R, Hanaoka T, Bauer T, Aye R, Kohman L, Sheppard B, Thurer R, Andaz S, Smith M *et al*: **Sublobar resection is equivalent to lobectomy for clinical stage 1A lung cancer in solid nodules.** *The Journal of thoracic and cardiovascular surgery* 2014, **147**(2):754-762; Discussion 762-754.
49. Guckenberger M: **Stereotactic body radiotherapy in operable patients with stage I NSCLC: where is the evidence?** *Expert review of anticancer therapy* 2015, **15**(5):525-530.
50. Timmerman R, Paulus R, Galvin J, Michalski J, Straube W, Bradley J, Fakiris A, Bezjak A, Videtic G, Johnstone D *et al*: **Stereotactic body radiation therapy for inoperable early stage lung cancer.** *JAMA : the journal of the American Medical Association* 2010, **303**(11):1070-1076.
51. Dupuy DE, Fernando HC, Hillman S, Ng T, Tan AD, Sharma A, Rilling WS, Hong K, Putnam JB: **Radiofrequency ablation of stage IA non-small cell lung cancer in medically inoperable patients: Results from the American College of**

- Surgeons Oncology Group Z4033 (Alliance) trial.** *Cancer* 2015, **121**(19):3491-3498.
52. Palussiere J, Chomy F, Savina M, Deschamps F, Gaubert JY, Renault A, Bonnefoy O, Laurent F, Meunier C, Bellera C *et al*: **Radiofrequency ablation of stage IA non-small cell lung cancer in patients ineligible for surgery: results of a prospective multicenter phase II trial.** *Journal of cardiothoracic surgery* 2018, **13**(1):91.
  53. Tanner NT, Dai L, Bade BC, Gebregziabher M, Silvestri GA: **Assessing the Generalizability of the National Lung Screening Trial: Comparison of Patients with Stage 1 Disease.** *American journal of respiratory and critical care medicine* 2017, **196**(5):602-608.
  54. Hestbech MS, Siersma V, Dirksen A, Pedersen JH, Brodersen J: **Participation bias in a randomised trial of screening for lung cancer.** *Lung cancer (Amsterdam, Netherlands)* 2011, **73**(3):325-331.
  55. Slatore CG, Sullivan DR, Pappas M, Humphrey LL: **Patient-centered outcomes among lung cancer screening recipients with computed tomography: a systematic review.** *J Thorac Oncol* 2014, **9**(7):927-934.
  56. Wu GX, Raz DJ, Brown L, Sun V: **Psychological Burden Associated With Lung Cancer Screening: A Systematic Review.** *Clinical lung cancer* 2016, **17**(5):315-324.
  57. Brodersen J, Thorsen H, Kreiner S: **Consequences Of Screening in Lung Cancer: Development and Dimensionality of a Questionnaire.** *Value in Health* 2010, **13**(5):601-612.
  58. Aggestrup LM, Hestbech MS, Siersma V, Pedersen JH, Brodersen J: **Psychosocial Consequences of Allocation to Lung Cancer Screening - a Randomised Controlled Trial.** *BMJ Open* 2012, **10**.1136/bmjopen-2011-000663.
  59. Rasmussen JF, Siersma V, Pedersen JH, Brodersen J: **Psychosocial consequences in the Danish randomised controlled lung cancer screening trial (DLCST).** *Lung cancer (Amsterdam, Netherlands)* 2015, **87**(1):65-72.
