# Supplementary material
Source: HighWire-hosted journal article supplement (https://erj.ersjournals.com/content/55/2/1900506)
Supplement: inline-supplementary-material-2 [file inline-supplementary-material-2.pdf]

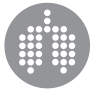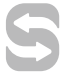

SHAREABLE PDF

# ESR/ERS statement paper on lung cancer screening

Hans-Ulrich Kauczor<sup>1</sup>, Anne-Marie Baird <sup>2</sup>, Torsten Gerriet Blum<sup>3</sup>, Lorenzo Bonomo<sup>4</sup>, Clementine Bostantzoglou<sup>5</sup>, Otto Burghuber<sup>6</sup>, Blanka Čepická<sup>7</sup>, Alina Comanescu<sup>8</sup>, Sébastien Couraud<sup>9,10</sup>, Anand Devaraj<sup>11</sup>, Vagn Jespersen<sup>12</sup>, Sergey Morozov<sup>13</sup>, Inbar Nardi Agmon<sup>14</sup>, Nir Peled<sup>15</sup>, Pippa Powell<sup>16</sup>, Helmut Prosch <sup>17</sup>, Sofia Ravara<sup>18,19</sup>, Janette Rawlinson<sup>20</sup>, Marie-Pierre Revel<sup>21</sup>, Mario Silva<sup>22</sup>, Annemiek Snoeckx<sup>23</sup>, Bram van Ginneken<sup>24,25</sup>, Jan P. van Meerbeeck<sup>26</sup>, Constantine Vardavas<sup>27,28</sup>, Oyunbileg von Stackelberg<sup>1</sup> and Mina Gaga <sup>29</sup>, on behalf of the European Society of Radiology (ESR) and the European Respiratory Society (ERS)

**Affiliations:** <sup>1</sup>Dept of Diagnostic and Interventional Radiology, University Hospital Heidelberg, German Center of Lung Research, Heidelberg, Germany. <sup>2</sup>Central Pathology Laboratory, Trinity College Dublin, St. James's Hospital, Dublin, Ireland. <sup>3</sup>Dept of Pneumology, Klinikum Emil von Behring, Berlin, Germany. <sup>4</sup>Dept of Radiology, Policlinico Universitario Agostino Gemelli, Rome, Italy. <sup>5</sup>Intensive Care Unit, Korgialeneion-Benakeion General Hospital, Athens, Greece. <sup>6</sup>Otto Wagner Hospital Vienna, Vienna, Austria. <sup>7</sup>S.E.N.A. s.r.o., Prague, Czech Republic. <sup>8</sup>Community Health Association Romania, Bucharest, Romania. <sup>9</sup>Service de Pneumologie et Oncologie Thoracique, Hospices Civils de Lyon, CH Lyon Sud, Pierre Bénite, France. <sup>10</sup>Faculté de Médecine et de Maïeutique Lyon Sud – Charles Mérieux, Université Claude Bernard Lyon I, Oullins, France. <sup>11</sup>Royal Brompton Hospital, London, UK. <sup>12</sup>Holstebro, Denmark. <sup>13</sup>Dept of Health Care of Moscow, Research and Practical Clinical Center of Diagnostics and Telemedicine Technologies, Moscow, Russian Federation. <sup>14</sup>Internal Medicine F, Rabin Medical Center, Petah Tikva, Israel. <sup>15</sup>Thoracic Cancer Unit, Rabin Medical Center, Petach Tiqwa, Israel. <sup>16</sup>European Lung Foundation, Sheffield, UK. <sup>17</sup>Dept of Biomedical Imaging and Image-guided Therapy, Medical University of Vienna, Vienna, Austria. <sup>18</sup>Medical Sciences, Faculty of Health Sciences, University of Beira Interior, Covilha, Portugal. <sup>19</sup>Tobacco Cessation Unit, CHCB University Hospital, Covilha, Portugal. <sup>20</sup>ELF Advocacy, Tipton, UK. <sup>21</sup>Radiology Dept, Cochin Hospital, APHP, Paris, France. <sup>22</sup>Section of Radiology, Dept of Medicine and Surgery (DiMeC), University of Parma, Parma, Italy. <sup>23</sup>Radiology, University Hospital of Antwerp, Edegem, Belgium. <sup>24</sup>Image Sciences Institute, University Medical Centre, Utrecht, The Netherlands. <sup>25</sup>Dept of Radiology, Nijmegen Medical Centre, Nijmegen, The Netherlands. <sup>26</sup>Pulmonology, Universitair Ziekenhuis Antwerpen, Edegem, Belgium. <sup>27</sup>Clinic of Social and Family Medicine, Faculty of Medicine, University of Crete, Heraklion, Greece. <sup>28</sup>Center for Global Tobacco Control, Department of Society, Human Development and Health, Harvard School of Public Health, Boston, MA, USA. <sup>29</sup>th Respiratory Medicine Dept, Athens Chest Hospital Sotiria, Athens, Greece.

**Correspondence:** Hans-Ulrich Kauczor, Dept of Diagnostic and Interventional Radiology, University Hospital Heidelberg, INF 110, Heidelberg 69120, Germany. E-mail: hans-ulrich.kauczor@med.uni-heidelberg.de

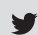

@ERSpublications

The ESR and ERS agree that Europe's healthcare systems need to allow citizens to benefit from organised pathways to early diagnosis and reduction of mortality of lung cancer. Now is the time to set up and implement large-scale programmes. <http://bit.ly/2miF0cO>

**Cite this article as:** Kauczor H-U, Baird A-M, Blum TG, *et al.* ESR/ERS statement paper on lung cancer screening. *Eur Respir J* 2020; 55: 1900506 [<https://doi.org/10.1183/13993003.00506-2019>].

This single-page version can be shared freely online.

**ABSTRACT** In Europe, lung cancer ranks third among the most common cancers, remaining the biggest killer. Since the publication of the first European Society of Radiology and European Respiratory Society

This official statement of the European Society of Radiology (ESR) and the European Respiratory Society (ERS) is published jointly in *European Radiology* [DOI: 10.1007/s00330-020-06727-7] and the *European Respiratory Journal* [DOI: 10.1183/13993003.00506-2019]. The versions are identical aside from minor differences in typesetting and presentation in accord with the journal styles. ©European Society of Radiology and European Respiratory Society 2020.

joint white paper on lung cancer screening (LCS) in 2015, many new findings have been published and discussions have increased considerably. Thus, this updated expert opinion represents a narrative, non-systematic review of the evidence from LCS trials and description of the current practice of LCS as well as aspects that have not received adequate attention until now. Reaching out to the potential participants (persons at high risk), optimal communication and shared decision-making will be key starting points. Furthermore, standards for infrastructure, pathways and quality assurance are pivotal, including promoting tobacco cessation, benefits and harms, overdiagnosis, quality, minimum radiation exposure, definition of management of positive screen results and incidental findings linked to respective actions as well as cost-effectiveness. This requires a multidisciplinary team with experts from pulmonology and radiology as well as thoracic oncologists, thoracic surgeons, pathologists, family doctors, patient representatives and others. The ESR and ERS agree that Europe's health systems need to adapt to allow citizens to benefit from organised pathways, rather than unsupervised initiatives, to allow early diagnosis of lung cancer and reduce the mortality rate. Now is the time to set up and conduct demonstration programmes focusing, among other points, on methodology, standardisation, tobacco cessation, education on healthy lifestyle, cost-effectiveness and a central registry.
